# Supplementary material
Source: publisher site journal article supplement (http://static.cambridge.org/content/id/urn:cambridge.org:id:article:S1041610218001370/resource/name/S1041610218001370supp001.docx)
Supplement: Supplementary file 1 [file S1041610218001370supp001.docx]

**Supplementary Table 1.** Evaluation of the quality of the studies through Quality Assessment of Diagnostic Accuracy Studies 2 (QUADAS-2) tool

|  | Risk of Bias | | | | Applicability | | |
| --- | --- | --- | --- | --- | --- | --- | --- |
| Study | **Patient Selection** | **Index Test** | **Reference Standard** | **Flow and timing** | **Patient Selection** | **Index Test** | **Reference Standard** |
| Sale *et al.* (2018) | Low | Low | Low | Low | High | High | High |
| Delgado *et al.* (2017) | Low | Low | Low | Low | High | High | High |
| Janelidze *et al.* (2017) | Low | Low | Low | Unclear | High | High | High |
| Matías-Guiu *et al.* (2017) | Low | Low | Low | Low | High | High | High |
| Roalf *et al.* (2017) | Low | Low | Low | Low | High | High | High |
| Chen *et al.* (2016) | Low | Low | Low | Low | High | High | High |
| Mellor *et al.* (2016) | Low | Low | Low | Low | High | High | High |
| Tsai *et al.* (2016) | Unclear | Low | Unclear | Low | Low | High | Unclear |
| Chu *et al.* (2015) | Low | Low | Low | Low | High | High | High |
| Horton *et al.* (2015) | Low | Low | Low | Low | High | High | High |
| Hsu *et al.* (2015) | Low | Low | Low | Low | High | High | High |
| Tan *et al.* (2015) | Low | Low | Low | Low | High | High | High |
| Cecato *et al.* (2014) | Low | Low | Low | Low | High | High | High |
| Kaya *et al.* (2014) | Low | Low | Low | Low | High | High | High |
| Malek-Ahmadi *et al.* (2014) | Unclear | Low | Low | Unclear | Low | High | High |
| Yeung *et al.* (2014) | High | Low | Low | Low | Low | High | High |
| Zhou *et al.* (2014) | Low | Low | Low | Low | High | High | High |

**Supplementary Table 1.** Evaluation of the quality of the studies through Quality Assessment of Diagnostic Accuracy Studies 2 (QUADAS-2) tool (*continuation*)

|  | Risk of Bias | | | | Applicability | | |
| --- | --- | --- | --- | --- | --- | --- | --- |
| Study | **Patient Selection** | **Index Test** | **Reference Standard** | **Flow and timing** | **Patient Selection** | **Index Test** | **Reference Standard** |
| Dong *et al.* (2013) | Low | Low | Low | Low | High | High | High |
| Freitas *et al.* (2013) | Low | Low | Low | Low | High | High | High |
| Hu *et al.* (2013) | Low | Low | Low | Low | High | High | High |
| Memoria *et al.* (2013) | Low | Low | Low | Low | High | High | High |
| Roalf *et al.* (2013) | Low | Low | Low | Low | High | High | High |
| Wang *et al.* (2013) | Low | Low | Low | Low | High | High | High |
| Dong *et al.* (2012) | Low | Low | Low | Low | High | High | High |
| Lifshitz *et al.* (2012) | Low | Low | Unclear | Low | High | High | Unclear |
| Magierska *et al.* (2012) | Low | Low | Low | Low | High | High | High |
| Tsai *et al.* (2012) | Low | Low | Low | Low | High | High | High |
| Yu *et al.* (2012) | Low | Low | Unclear | Low | High | High | Low |
| Lu *et al.* (2011) | Low | Low | Low | Low | High | High | High |
| Fujiwara *et al.* (2010) | Low | Low | Low | Low | High | High | High |
| Guo *et al.* (2010) | Low | Low | Low | Low | High | High | High |
| Luis *et al.* (2009) | Low | Low | Low | Low | High | High | High |
| Lee *et al.* (2008) | Low | Low | Low | Low | High | High | High |
| Nasreddine *et al.* (2005) | Low | Low | Low | Low | High | High | High |
